# Supplementary material for: Proteomic analysis of small extracellular vesicles from the plasma of patients with hepatocellular carcinoma
Source: PubMed Central journal article supplement (PMC9724420; doi:10.1186/s12957-022-02849-y), 2022-12-06
Supplement: 12957_2022_2849_MOESM1_ESM.pdf [file 12957_2022_2849_MOESM1_ESM.pdf]

**Supplementary Table 1:**

| <b>Variables</b>    | <b>NC</b> | <b>HCC</b> | <b>P-value</b> |
|---------------------|-----------|------------|----------------|
| <b>Age</b>          |           |            | 0.2537         |
| <b>≤50</b>          | 7         | 14         |                |
| <b>&gt; 50</b>      | 15        | 14         |                |
| <b>Sex</b>          |           |            | 0.7608         |
| <b>male</b>         | 14        | 20         |                |
| <b>female</b>       | 8         | 8          |                |
| <b>HBsAg(ng/mL)</b> |           |            | 0.5355         |
| <b>≤ 0.5</b>        | 8         | 7          |                |
| <b>&gt; 0.5</b>     | 14        | 21         |                |
| <b>ALT(U/L)</b>     |           |            | 0.2533         |
| <b>≤ 40</b>         | 10        | 18         |                |
| <b>&gt; 40</b>      | 12        | 10         |                |
| <b>AST(U/L)</b>     |           |            | 0.3926         |
| <b>≤ 40</b>         | 10        | 17         |                |
| <b>&gt; 40</b>      | 12        | 11         |                |
| <b>Cirrhosis</b>    |           |            | 0.1501         |
| <b>YES</b>          | 11        | 20         |                |
| <b>NO</b>           | 11        | 8          |                |
| <b>Smoking</b>      |           |            | 0.7527         |
| <b>YES</b>          | 7         | 7          |                |
| <b>NO</b>           | 15        | 21         |                |
